# Supplementary material
Source: PubMed Central journal article supplement (PMC8921512)
Supplement: 41598_2022_7890_MOESM1_ESM.pdf [file 41598_2022_7890_MOESM1_ESM.pdf]

**Table S1.** Non imaging variables in the train/validation and test datasets

| <b>Binary</b>                                            |                      |                                           |       |                               |                 |
|----------------------------------------------------------|----------------------|-------------------------------------------|-------|-------------------------------|-----------------|
| Variable                                                 |                      | Train/validation                          |       | Test                          |                 |
| Sex                                                      |                      | F=134                                     | M=317 | F=32 M=75                     |                 |
| Diabetes                                                 |                      | Y=107                                     | N=344 | Y=24 N=83                     |                 |
| Hypertension                                             |                      | Y=199                                     | N=252 | Y=56 N=51                     |                 |
| Cardiovascular Disease                                   |                      | Y=222                                     | N=229 | Y=41 N=66                     |                 |
| Oncological (last 5 yrs)                                 |                      | Y=34                                      | N=417 | Y=7 N=100                     |                 |
| <b>Numerical</b>                                         |                      |                                           |       |                               |                 |
| Variable                                                 | Measure Unit         | Median (10th-90th PCTL): Train/validation |       | Median (10th-90th PCTL): Test | Reference range |
| Age                                                      | yrs                  | 66 (50-80)                                |       | 64 (46.2-76.8)                |                 |
| Body Mass Index (BMI)                                    |                      | 25.7 (21.7-32.1)                          |       | 27.2 (23.4-33.3)              |                 |
| Body Temperature                                         | °C                   | 37.5 (36.4-38.9)                          |       | 37.5 (36.3-38.8)              | < 37            |
| Heart Rate (HR)                                          | bpm                  | 92 (68-116)                               |       | 91 (74-118)                   | 60-100          |
| Diastolic Blood Pressure (DBP)                           | mmHg                 | 76 (63-88)                                |       | 76 (64-89)                    | 60-80           |
| Systolic Blood Pressure (SBP)                            | mmHg                 | 127 (107-158)                             |       | 129 (106-155)                 | 90-120          |
| <i>Arterial Blood Gas Analysis</i>                       |                      |                                           |       |                               |                 |
| pCO <sub>2</sub>                                         | mmHg                 | 36 (29-48)                                |       | 36 (31-43)                    | 35-48           |
| HCO <sub>3</sub>                                         | mmol/L               | 25.4 (20.8-29.7)                          |       | 25.5 (22.2-29.1)              | 21-28           |
| PaO <sub>2</sub> /FiO <sub>2</sub>                       | mmHg                 | 254 (89-356)                              |       | 260 (86-378)                  | ≥ 300           |
| Lactate (LAC)                                            | mmol/L               | 1.1 (0.6-2.2)                             |       | 1.0 (0.6-2.1)                 | 0.5-1.6         |
| SO <sub>2</sub>                                          | %                    | 94.1 (82.5-98.1)                          |       | 93.5 (80.7-98)                | 95-99           |
| <i>Complete Blood Count</i>                              |                      |                                           |       |                               |                 |
| White Blood Cell Count (WBC)                             | ·10 <sup>9</sup> /L  | 7 (3.6-13.8)                              |       | 7.17 (3.8-12.8)               | 4.5-10          |
| Red Blood Cell Count (RBC)                               | ·10 <sup>12</sup> /L | 4.3 (3.6-5)                               |       | 4.4 (3.8-5)                   | 4.2-6.3         |
| Hemoglobin (Hb)                                          | g/dL                 | 13 (10.8-14.8)                            |       | 13.3 (11.2-14.7)              | 14-18           |
| Hematocrit (HCT)                                         | %                    | 39.7 (33.5-45.4)                          |       | 39.9 (34.3-45.6)              | 40-52           |
| Red Blood Cell Distribution Width (RDW)                  | %                    | 12.3 (11.5-14)                            |       | 12.0 (11.2-13.5)              | 10.6-13.8       |
| Granulocyte Neutrophils %                                | %                    | 78 (57.4-90.3)                            |       | 77.5 (54.6-89.3)              | 41-70           |
| Granulocyte Eosinophils %                                | %                    | 0.2 (0.1-1.6)                             |       | 0.2 (0.1-1.5)                 | 1-5             |
| Granulocyte Basophils %                                  | %                    | 0.2 (0-0.9)                               |       | 0.2 (0-0.9)                   | 0.1-2           |
| Monocytes %                                              | %                    | 6.4 (2.8-11.5)                            |       | 6.7 (3.5-11.9)                | 1-12            |
| Lymphocytes %                                            | %                    | 14.1 (5.4-30.4)                           |       | 14.2 (5.8-31.8)               | 20-50           |
| Platelets (PLT)                                          | ·10 <sup>9</sup> /L  | 181 (107-335)                             |       | 204 (126-309)                 | 130-450         |
| <i>Additional Blood / Laboratory Analysis</i>            |                      |                                           |       |                               |                 |
| Erythrocyte Sedimentation Rate (ESR)                     | mm/hour              | 5.5 (1.9-8.1)                             |       | 5.4 (1.9-8)                   | variable        |
| C-reactive Protein (CRP)                                 | mg/L                 | 94.3 (17-246.9)                           |       | 82.7 (19.1-229)               | < 5             |
| Albumin                                                  | g/dL                 | 3.2 (2.7-3.7)                             |       | 3.2 (2.8-3.6)                 | 3.1-5.2         |
| Prothrombin Time International Normalized Ratio (PT INR) |                      | 1.02 (0.92-1.27)                          |       | 1 (0.93-1.19)                 | 0.8-1.2         |
| Aspartate Aminotransferase (AST)                         | U/L                  | 46 (25-101)                               |       | 48 (23-103)                   | < 60            |
| Alanine Aminotransferase (ALT)                           | U/L                  | 33 (13-92)                                |       | 38 (14-107)                   | < 35            |
| Total Bilirubin                                          | mg/dL                | 0.7 (0.5-1.3)                             |       | 0.6 (0.4-1.2)                 | < 1.2           |
| Creatine kinase (CK)                                     | U/L                  | 102 (33-498)                              |       | 100 (36-363)                  | 30-200          |
| Lactic Acid Dehydrogenase (LDH)                          | U/L                  | 391 (229-699)                             |       | 375 (242-699)                 | 125-220         |
| Sodium                                                   | mmol/L               | 140 (135-144)                             |       | 140 (136-145)                 | 136-145         |
| Potassium                                                | mmol/L               | 4.1 (3.4-4.9)                             |       | 4 (3.5-4.9)                   | 3.3-5.1         |
| Creatinine                                               | mg/dL                | 0.85 (0.64-1.6)                           |       | 0.83 (0.68-1.6)               | 0.72-1.18       |
| Urea                                                     | mg/dL                | 38 (21-82)                                |       | 38 (24-90)                    | 18-55           |

**Table S2.** CatBoost main hyperparameters in the final trained model

| Hyperparameter              | Value    |
|-----------------------------|----------|
| Loss function               | LogLoss  |
| Iterations/number of trees  | 12483    |
| Learning rate               | 0.008    |
| L2 leaf regularization term | 4.136    |
| Boosting type               | Ordered  |
| Bootstrap type              | Bayesian |
| random subspace method      | 0.076    |
| Bagging temperature         | 3.102    |
